# Supplementary material for: Survey report on keratoplasty in China: A 5-year review from 2014 to 2018
Source: PubMed Central journal article supplement (PMC7561196; doi:10.1371/journal.pone.0239939), 2020-10-15
Supplement: pone.0239939.s001.pdf [file pone.0239939.s001.pdf]

**全国角膜移植手术调查登记表（中文）**

单位名称:

填报人员:

联系电话:

| 序号          | 时间   | 住院号                                                    | 姓名 | 性别 | 接受手术年龄(岁/月) | 术前诊断 | 手术方式 | 供体保存方式 | 并发症 | 其他 |
|-------------|------|--------------------------------------------------------|----|----|-------------|------|------|--------|-----|----|
| 1           | 2014 |                                                        |    |    |             |      |      |        |     |    |
| 2           | 2015 |                                                        |    |    |             |      |      |        |     |    |
| 3           | 2016 |                                                        |    |    |             |      |      |        |     |    |
| 4           | 2017 |                                                        |    |    |             |      |      |        |     |    |
| 5           | 2018 |                                                        |    |    |             |      |      |        |     |    |
| .....       |      |                                                        |    |    |             |      |      |        |     |    |
| <b>填表说明</b> |      | 1. 时间: 按年限分开统计, 表格中时间用阿拉伯数字, 数字后不写单位。例: 2017 或 2018;   |    |    |             |      |      |        |     |    |
|             |      | 2. 姓名: 为了保护患者隐私, 可简写或用字母表示;                            |    |    |             |      |      |        |     |    |
|             |      | 3. 手术年龄: 用阿拉伯数字, 整岁数字后面不写单位, 不满一岁按实际月龄填报               |    |    |             |      |      |        |     |    |
|             |      | 4. 手术方式: 请按以下方式填写: PK, ALK, EK, 干细胞移植、三联               |    |    |             |      |      |        |     |    |
|             |      | 5. 供体保存方式: 请按以下方式填写: 中期保存、甘油脱水保存、湿房保存。其他情况请备注。         |    |    |             |      |      |        |     |    |
| <b>备注</b>   |      | 本统计表请于 3 月 25 号前以邮件形式反馈至指定邮箱 (sdykzkzx@163.com), 谢谢配合。 |    |    |             |      |      |        |     |    |

**Questionnaire of Keratoplasty in China (English)**

Hospital name:

Completed by:

Phone number:

| No.                | Year | Hospitalization No.                                                                                                                                  | Name | Gender | Patient's Age (year/month) | Disease | Surgical Technique | Cornea Preservation Method | Complication | Others |
|--------------------|------|------------------------------------------------------------------------------------------------------------------------------------------------------|------|--------|----------------------------|---------|--------------------|----------------------------|--------------|--------|
| 1                  | 2014 |                                                                                                                                                      |      |        |                            |         |                    |                            |              |        |
| 2                  | 2015 |                                                                                                                                                      |      |        |                            |         |                    |                            |              |        |
| 3                  | 2016 |                                                                                                                                                      |      |        |                            |         |                    |                            |              |        |
| 4                  | 2017 |                                                                                                                                                      |      |        |                            |         |                    |                            |              |        |
| 5                  | 2018 |                                                                                                                                                      |      |        |                            |         |                    |                            |              |        |
| .....              |      |                                                                                                                                                      |      |        |                            |         |                    |                            |              |        |
| <b>Explanation</b> |      | 1. Year: Please provide the information of keratoplasty in 2014, 2015, 2016, 2017 and 2018 separately.                                               |      |        |                            |         |                    |                            |              |        |
|                    |      | 2. Name: To protect the privacy of the patients, abbreviations or letters instead of their real name can be used.                                    |      |        |                            |         |                    |                            |              |        |
|                    |      | 3. Patient's Age: Please use Arabic numerals. For patients under one year old, please use unit "month" instead of "year".                            |      |        |                            |         |                    |                            |              |        |
|                    |      | 4. Surgical Technique: Penetrating keratoplasty, anterior lamellar keratoplasty, endothelial keratoplasty, keratoprosthesis, keratolimbal allograft. |      |        |                            |         |                    |                            |              |        |
|                    |      | 5. Cornea Preservation Method: Mid-term storage, dehydration, moist chamber. Please write down other conditions in "Others".                         |      |        |                            |         |                    |                            |              |        |
| <b>Note</b>        |      | Please send the questionnaire back to <a href="mailto:sdykzkzx@163.com">sdykzkzx@163.com</a> before March 25. Thank you for your cooperation.        |      |        |                            |         |                    |                            |              |        |
